# Supplementary material for: SNP rs3202538 in 3′UTR region of ErbB3 regulated by miR-204 and miR-211 promote gastric cancer development in Chinese population
Source: Cancer Cell Int. 2017 Sep 13;17:81. doi: 10.1186/s12935-017-0449-z (PMC5599891; doi:10.1186/s12935-017-0449-z)
Supplement: Supplementary file 1 — Additional file 1. The output files of overal survival rate comparison in different groups analyzed by Kaplan–Meier survival curve. [file 12935_2017_449_MOESM1_ESM.xlsx]

## Sheet: Survival proportions
month	GT/TT	GG
0	100	100
0.2	100	100
0.4	100	100
0.6	99.5192	100
0.8	99.5192	100
1	99.0361	100
1.2	98.553	100
1.4	98.0699	100
1.6	97.5868
1.8	97.1037	100
2	97.1037
2.2	96.6182	100
2.4	96.1327	100
2.6	95.6472	100
2.8	95.1616	100
3	94.6761	99.1803
3.2	94.1906	99.1803
3.4	93.7051	98.3538
3.6	93.2196	98.3538
3.8		98.3538
4	92.734	98.3538
4.2	92.2485	98.3538
4.4	92.2485	97.4986
4.6	91.7604	97.4986
4.8		97.4986
5	91.7604	97.4986
5.2	91.2697	96.6202
5.4	90.779	96.6202
5.6		96.6202
5.8	90.2883	95.7256
6	90.2883	95.7256
6.2	89.795	95.7256
6.4	89.795
6.6	89.2989	95.7256
6.8	88.8028
7	88.8028	95.7256
7.2	88.3039
7.4		95.7256
7.6	87.805
7.8	87.805	95.7256
8	87.3032
8.2	87.3032	94.7778
8.4	87.3032
8.6		94.7778
8.8
9	87.3032	94.7778
9.2	87.3032
9.4	87.3032
9.6	87.3032	94.7778
9.8	87.3032
10	87.3032
10.2	87.3032	93.8007
10.4	87.3032
10.6	87.3032
10.8	87.3032
11	87.3032
11.2	87.3032
11.4		93.8007
11.6	87.3032
11.8
12	87.3032
12.2
12.4	87.3032	92.8133
12.6	86.7472
12.8	86.7472
13	86.1875
13.2
13.4	85.6278
13.6		92.8133
13.8	85.0682
14	85.0682
14.2	85.0682
14.4	84.5011	92.8133
14.6	83.9339
14.8	83.3668
15	82.7997
15.2	82.2326	91.8045
15.4	82.2326	91.8045
15.6	81.6615	91.8045
15.8	81.0905
16	80.5194	91.8045
16.2	79.9483	90.7613
16.4	79.3773	90.7613
16.6	79.3773
16.8	79.3773	90.7613
17
17.2	79.3773	90.7613
17.4	79.3773	90.7613
17.6	78.7893	89.6677
17.8	78.2013	88.5742
18	78.2013
18.2	77.6089	87.4807
18.4	77.6089	87.4807
18.6	77.6089	87.4807
18.8	77.6089
19	77.6089
19.2	76.9978	87.4807
19.4
19.6	76.9978	87.4807
19.8
20	76.9978	87.4807
20.2	76.9978	87.4807
20.4
20.6	76.9978	87.4807
20.8	76.9978	87.4807
21
21.2	76.3615
21.4	75.7251
21.6		87.4807
21.8	75.0888
22	74.4524
22.2
22.4
22.6	74.4524
22.8		87.4807
23	73.8106
23.2		87.4807
23.4	73.1688
23.6	72.5269	87.4807
23.8
24	72.5269
24.2	71.8794	87.4807
24.4
24.6		87.4807
24.8	71.2318
25	70.5842	87.4807
25.2	69.9367
25.4	69.2891
25.6	68.6415	87.4807
25.8		87.4807
26	67.994	86.0922
26.2		86.0922
26.4		86.0922
26.6		86.0922
26.8	67.3464	86.0922
27	66.6989	86.0922
27.2		84.5818
27.4	66.0513	84.5818
27.6	65.4037	84.5818
27.8	64.7562
28
28.2
28.4		84.5818
28.6
28.8
29	64.1086	82.9859
29.2
29.4
29.6	63.4611
29.8
30	62.8135
30.2
30.4	62.1659
30.6		81.39
30.8	61.5184
31	60.8708	81.39
31.2		81.39
31.4		81.39
31.6	60.2232
31.8		79.6944
32		79.6944
32.2
32.4	59.5757	79.6944
32.6
32.8		77.9234
33	58.9281	77.9234
33.2	58.2806	76.1112
33.4	57.633	76.1112
33.6
33.8	57.633
34	56.9781	76.1112
34.2
34.4	56.3232
34.6	55.6682
34.8	55.0133	76.1112
35		76.1112
35.2	54.3584	74.1083
35.4
35.6	53.7035	72.1054
35.8	53.7035
36
36.2	53.7035	70.1024
36.4		70.1024
36.6	53.0322	70.1024
36.8
37	52.3609
37.2	52.3609
37.4	51.6809
37.6	51.0009	70.1024
37.8		70.1024
38
38.2
38.4	50.3209	70.1024
38.6	50.3209
38.8		70.1024
39	49.6315
39.2		70.1024
39.4	48.9422
39.6	48.2529
39.8	48.2529
40	47.5536	70.1024
40.2
40.4
40.6		70.1024
40.8	46.8542
41		70.1024
41.2
41.4	46.1549
41.6	46.1549	70.1024
41.8	45.4449
42	44.7348
42.2	44.7348	70.1024
42.4	44.7348
42.6	44.0014
42.8	43.2681	70.1024
43	43.2681
43.2	42.5221
43.4	41.776	70.1024
43.6	41.776
43.8
44	41.776	70.1024
44.2	41.776
44.4	40.9878
44.6	40.9878
44.8	40.1842
45	39.3805	70.1024
45.2	38.5768
45.4	37.7731
45.6	37.7731
45.8	37.7731
46	36.9337
46.2	36.9337
46.4		70.1024
46.6
46.8
47		70.1024
47.2
47.4
47.6
47.8	36.0748
48
48.2	35.2159
48.4
48.6	34.3569
48.8		65.9788
49
49.2		65.9788
49.4	33.498
49.6
49.8	33.498	61.5802
50
50.2
50.4
50.6	32.6165	57.1816
50.8
51		57.1816
51.2
51.4
51.6	31.735
51.8	31.735
52
52.2	31.735
52.4
52.6
52.8	31.735	52.4165
53	30.7733	52.4165
53.2
53.4	29.8116
53.6	29.8116
53.8	29.8116	47.1748
54	28.7836
54.2	28.7836
54.4
54.6	28.7836
54.8	28.7836
55	28.7836
55.2	28.7836	47.1748
55.4	27.5322	47.1748
55.6	26.2807	47.1748
55.8	26.2807	47.1748
56	26.2807
56.2	26.2807	47.1748
56.4	24.8207
56.6
56.8	23.3606	35.3811
57	21.9006	35.3811
57.2	20.4406
57.4	20.4406	35.3811
57.6	20.4406
57.8	18.7372
58	18.7372
58.2	18.7372
58.4	18.7372
58.6	18.7372
58.8	18.7372
59	18.7372
59.2	18.7372
59.4	18.7372
59.6	18.7372
59.8	18.7372
60	18.7372	35.3811

## Sheet: curve comparison
Comparison of Survival Curves
Log-rank (Mantel-Cox) test
Chi square	12.69
df	1
P value	0.0004
P value summary	***
Are the survival curves sig different?	Yes
Gehan-Breslow-Wilcoxon test
Chi square	12.74
df	1
P value	0.0004
P value summary	***
Are the survival curves sig different?	Yes
Median survival
GT/TT	39
GG	53.8
Ratio (and its reciprocal)	0.7249	1.379
95% CI of ratio	0.4831 to 1.088	0.9193 to 2.070
Hazard Ratio (Mantel-Haenszel)
Ratio (and its reciprocal)	1.872	0.5343
95% CI of ratio	1.326 to 2.643	0.3784 to 0.7543
Hazard Ratio (logrank)
Ratio (and its reciprocal)	2.045	0.4887
95% CI of ratio	1.321 to 2.644	0.3795 to 0.7521

## Sheet: Data Summary
	GT/TT	GG
Number of rows	300	300
# of blank lines	90	166
# rows with impossible data	0	0
# censored subjects	91	105
# deaths/events	119	29
Median survival	39	53.8
