# Supplementary material for: SNP rs3202538 in 3′UTR region of ErbB3 regulated by miR-204 and miR-211 promote gastric cancer development in Chinese population
Source: Cancer Cell Int. 2017 Sep 13;17:81. doi: 10.1186/s12935-017-0449-z (PMC5599891; doi:10.1186/s12935-017-0449-z)
Supplement: Supplementary file 2 — Additional file 2. The output files of relapse free survival rate comparison in different groups analyzed by Kaplan–Meier survival curve. [file 12935_2017_449_MOESM2_ESM.xlsx]

## Sheet: Survival proportions
month	GT/TT	GG
0	100	100
0.2	100	100
0.4	100	100
0.6	99.4536	100
0.8		100
1	98.9071	100
1.2	98.3607	100
1.4	97.8142	100
1.6	97.2678
1.8	96.7213	100
2
2.2	96.1749	100
2.4	95.6284	100
2.6	95.082	100
2.8	94.5355	100
3	93.9891	99.0991
3.2	93.4426	99.0991
3.4	92.8962	98.1899
3.6	92.3497	98.1899
3.8	91.8033	98.1899
4	91.2568	98.1899
4.2	90.7104	98.1899
4.4		97.2458
4.6	90.1639	97.2458
4.8	89.6175	97.2458
5		97.2458
5.2	89.071	96.2733
5.4	88.5246	96.2733
5.6	87.9781	96.2733
5.8	87.4317	95.2808
6
6.2	86.8852
6.4
6.6	86.3388	95.2808
6.8	85.7923
7	85.7923	95.2808
7.2	85.2424
7.4	84.6924	95.2808
7.6	84.1425
7.8	84.1425	95.2808
8	83.5889
8.2	83.5889	94.2452
8.4	83.5889
8.6		94.2452
8.8
9	83.5889
9.2
9.4
9.6
9.8
10
10.2		93.198
10.4
10.6	83.5889
10.8
11
11.2	83.5889
11.4		93.198
11.6	83.5889
11.8
12
12.2
12.4		92.1389
12.6	83.0125
12.8
13	82.436
13.2
13.4	81.8595
13.6	81.283	92.1389
13.8	80.7065
14	80.7065
14.2
14.4	80.1259	92.1389
14.6	80.1259
14.8
15
15.2	79.5411	91.055
15.4	79.5411	91.055
15.6	78.9519	91.055
15.8
16	78.9519	91.055
16.2	78.3582	89.9308
16.4	77.7646	89.9308
16.6
16.8	77.7646	89.9308
17
17.2		89.9308
17.4		89.9308
17.6	77.1664	88.7475
17.8	76.5683	87.5642
18
18.2	75.9701	86.3809
18.4	75.9701	86.3809
18.6	75.9701	86.3809
18.8
19
19.2	75.3623	86.3809
19.4
19.6		86.3809
19.8
20		86.3809
20.2		86.3809
20.4
20.6	75.3623	86.3809
20.8	75.3623	86.3809
21
21.2
21.4
21.6		86.3809
21.8	75.3623
22	74.7395
22.2
22.4
22.6	74.7395
22.8
23	74.7395
23.2
23.4	74.1061
23.6	74.1061	86.3809
23.8
24
24.2		86.3809
24.4	73.4672
24.6		86.3809
24.8	72.8284
25		86.3809
25.2	72.1895
25.4	71.5507
25.6	70.9119	86.3809
25.8	70.273	86.3809
26	70.273	84.8916
26.2	69.6283	84.8916
26.4	68.9836	84.8916
26.6	68.3389
26.8	68.3389
27	67.6881	84.8916
27.2	67.0372	83.3195
27.4		83.3195
27.6		83.3195
27.8
28	66.3863
28.2	66.3863
28.4		83.3195
28.6	66.3863
28.8
29	65.7225	81.6531
29.2	65.7225
29.4	65.7225
29.6	65.0449
29.8	64.3674
30	63.6898
30.2	63.0123
30.4	63.0123
30.6		79.9867
30.8	62.3274
31	61.6424	79.9867
31.2	61.6424	79.9867
31.4		79.9867
31.6	60.9498
31.8	60.2572	78.2092
32	59.5646	78.2092
32.2
32.4	58.872	78.2092
32.6	58.1794
32.8	58.1794	76.3471
33	57.4784	76.3471
33.2	56.7775	74.4385
33.4		74.4385
33.6
33.8
34	56.0765	74.4385
34.2	55.3756
34.4	55.3756
34.6
34.8	54.6656	74.4385
35		74.4385
35.2	54.6656	72.3116
35.4
35.6	53.9463	70.1848
35.8
36
36.2		68.058
36.4		68.058
36.6	53.227	68.058
36.8	52.5078
37	51.7885
37.2	51.7885
37.4	51.0591
37.6		68.058
37.8	50.3297	68.058
38	49.6002
38.2	48.8708
38.4	48.1414
38.6
38.8	48.1414
39	47.4008
39.2	46.6601
39.4
39.6	46.6601
39.8
40		68.058
40.2	45.9076
40.4	45.155
40.6		68.058
40.8	44.4024
41		68.058
41.2	43.6498
41.4
41.6	43.6498	68.058
41.8	42.884
42	42.1182
42.2	42.1182	68.058
42.4	42.1182
42.6	41.3235
42.8	40.5289	68.058
43
43.2
43.4	40.5289	68.058
43.6	40.5289
43.8
44	39.7017	68.058
44.2
44.4	38.8746
44.6	38.8746
44.8	38.0295
45	37.1844	68.058
45.2	36.3393
45.4
45.6
45.8	36.3393
46	35.4741
46.2	35.4741
46.4	35.4741	68.058
46.6	35.4741
46.8	35.4741
47	35.4741	68.058
47.2
47.4	35.4741
47.6
47.8	35.4741
48
48.2	35.4741
48.4
48.6	34.3991
48.8		64.0546
49
49.2	34.3991	64.0546
49.4	33.2895
49.6
49.8	33.2895	59.7843
50
50.2	33.2895
50.4
50.6	32.1006	55.514
50.8	32.1006
51	32.1006	55.514
51.2
51.4	32.1006
51.6	30.763
51.8	30.763
52
52.2	30.763
52.4
52.6
52.8	30.763	50.8878
53	29.2249	50.8878
53.2
53.4	27.6867
53.6	27.6867
53.8		45.799
54	26.0581
54.2	26.0581
54.4
54.6	26.0581
54.8
55
55.2	26.0581	45.799
55.4	24.0536	45.799
55.6	22.0492	45.799
55.8		45.799
56
56.2	22.0492	45.799
56.4	19.8442
56.6
56.8	17.6393	34.3493
57	17.6393	34.3493
57.2	17.6393
57.4	14.6995	34.3493
57.6
57.8	14.6995
58
58.2	14.6995
58.4
58.6
58.8
59	14.6995
59.2
59.4	14.6995
59.6
59.8
60	14.6995	34.3493

## Sheet: curve comparison
Comparison of Survival Curves
Log-rank (Mantel-Cox) test
Chi square	12.65
df	1
P value	0.0004
P value summary	***
Are the survival curves sig different?	Yes
Gehan-Breslow-Wilcoxon test
Chi square	12.22
df	1
P value	0.0005
P value summary	***
Are the survival curves sig different?	Yes
Median survival
GT/TT	38
GG	53.8
Ratio (and its reciprocal)	0.7063	1.416
95% CI of ratio	0.4695 to 1.063	0.9411 to 2.130
Hazard Ratio (Mantel-Haenszel)
Ratio (and its reciprocal)	1.88	0.5319
95% CI of ratio	1.328 to 2.662	0.3756 to 0.7532
Hazard Ratio (logrank)
Ratio (and its reciprocal)	2.059	0.4856
95% CI of ratio	1.329 to 2.659	0.3761 to 0.7522

## Sheet: Data Summary
	GT/TT	GG
Number of rows	300	300
# of blank lines	115	177
# rows with impossible data	0	0
# censored subjects	73	94
# deaths/events	112	29
Median survival	38	53.8
